# Supplementary material for: Construction of Z-scheme NiO/NiC/g-C3N4composites using NiC as novel cocatalysts for the efficient photocatalytic degradation
Source: Royal Society of Chemistry journal article supplement (doi:10.1039/d1ra03562b), 2021-01-01
Supplement: d1ra03562b1.pdf [file d1ra03562b1.pdf]

# Construction of Z-scheme NiO/NiC/g-C<sub>3</sub>N<sub>4</sub> composites by using NiC as the novel cocatalysts for efficient photocatalytic degradation

## Supplementary information

Xiaojie Song<sup>1</sup>, Sisi Ye<sup>1</sup>, Xin Zhou, Wanrui Gui, Can Yang, Zhihong Yang\*

<sup>1</sup>, both authors contribute equally to this work.

Faculty of Materials Science and Chemistry, Engineering Research Center of Nano-Geomaterials of Ministry of Education, China University of Geosciences, Wuhan, 430074, China.

\* Corresponding author:

Dr. Zhihong Yang

Faculty of Materials Science and Chemistry,

China University of Geosciences, Hubei, Wuhan 430074, P. R. China,

E-mail: [yzhh05@126.com](mailto:yzhh05@126.com), Tel: +86-27-67884814

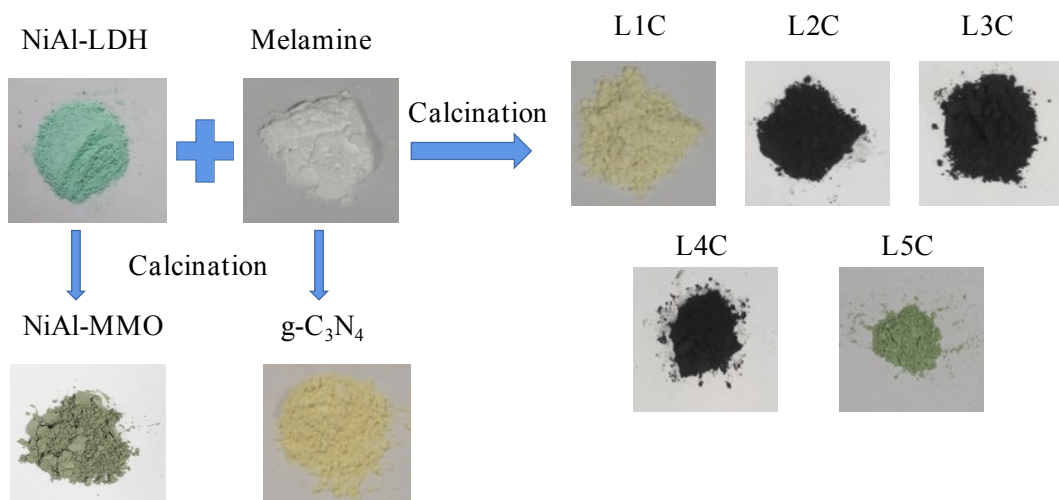

Fig. S1 The color of all the sample powders.

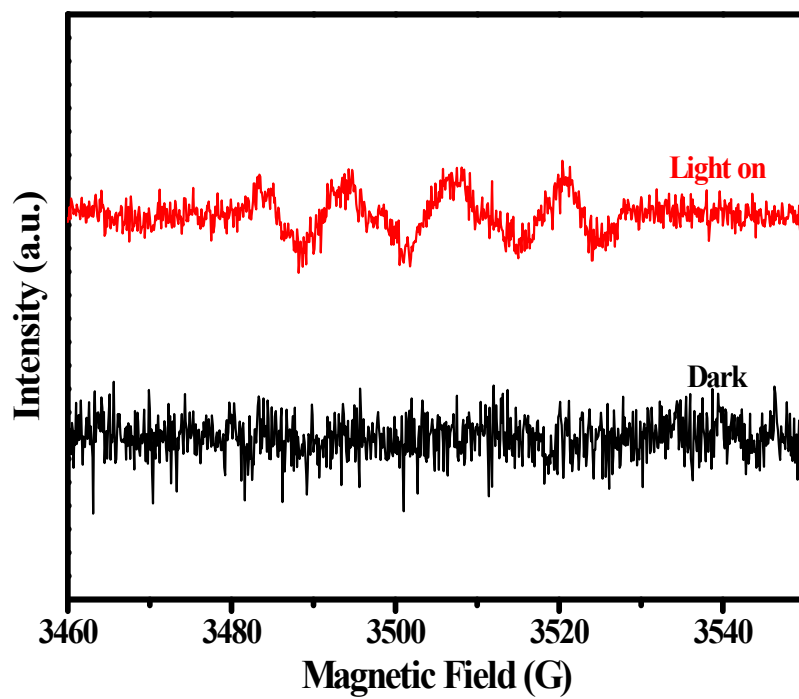

Fig. S2 The ESR spectra of  $O_2\cdot^-$  trapped by DMPO over L4C sample dispersion under darkness and light irradiation.
